# Supplementary material
Source: Elsevier journal article supplement (https://www.sciencedirect.com/science/article/pii/S2173572721000552)
Supplement: mmc1 [file S2173572721000552:mmc1.pdf]

TABLA 1. Criterios de inclusión y de exclusión específicos según la patología en Aorta Torácica Descendente (ATD).

| <b>CRITERIOS DE INCLUSION</b>                                                                                                                                                                                                                                                                                                                                                                                                                                                                              |
|------------------------------------------------------------------------------------------------------------------------------------------------------------------------------------------------------------------------------------------------------------------------------------------------------------------------------------------------------------------------------------------------------------------------------------------------------------------------------------------------------------|
| <p><i>Aneurisma de Aorta Torácica Roto (AATR)</i></p> <p>Fístula aortobronquial</p> <p>Fistula aortoesofágica</p>                                                                                                                                                                                                                                                                                                                                                                                          |
| <p><i>Transección Traumática de aorta torácica (TAT)</i></p> <p>Transección completa o incompleta de ATD secundaria a un evento traumático.</p>                                                                                                                                                                                                                                                                                                                                                            |
| <p><i>Disección aguda de aorta torácica complicada (DATBc)</i></p> <p>Pacientes diagnosticados dentro de los 14 días desde el inicio de la clínica y aparición de alguna de las siguientes complicaciones:</p> <ul style="list-style-type: none"> <li>- síndrome de mala perfusión o isquemia visceral</li> <li>- hipertensión refractaria al tratamiento</li> <li>- ruptura</li> <li>- dolor incontrolable</li> </ul> <p>(la disección debe ser distal a la salida de la arteria subclavia izquierda)</p> |
| <b>CRITERIOS DE EXCLUSION</b>                                                                                                                                                                                                                                                                                                                                                                                                                                                                              |
| Aneurismas micóticos                                                                                                                                                                                                                                                                                                                                                                                                                                                                                       |
| Disecciones retrógradas del cayado desde el punto de entrada                                                                                                                                                                                                                                                                                                                                                                                                                                               |
| Tortuosidad severa del acceso iliaco                                                                                                                                                                                                                                                                                                                                                                                                                                                                       |

Tabla 2. Variables de estudio preoperatorias, intraoperatorias y postoperatorias.

| Variables preoperatorias o demográficas                                |                                                                                       |                                                                                                     |
|------------------------------------------------------------------------|---------------------------------------------------------------------------------------|-----------------------------------------------------------------------------------------------------|
| Edad                                                                   |                                                                                       |                                                                                                     |
| Sexo                                                                   |                                                                                       |                                                                                                     |
| Factores de Riesgo Cardiovasculares                                    | Diabetes<br><br>Cardiopatía isquémica<br><br>EPOC<br><br>Enfermedad Cerebrovascular   |                                                                                                     |
| Grado ASA                                                              |                                                                                       |                                                                                                     |
| Niveles de Creatinina                                                  |                                                                                       |                                                                                                     |
| Variables específicas por indicación                                   |                                                                                       |                                                                                                     |
| Disección de Aorta torácica tipo B (DATB)                              | Aguda /Crónica                                                                        |                                                                                                     |
|                                                                        | Complicaciones agudas                                                                 | Isquemia visceral<br><br>Ruptura<br><br>Dilatación<br><br>Dolor refractario<br><br>Isquemia de MMII |
| Aneurisma de Aorta torácica (AAT)                                      | Integro /Rotura<br><br>Etiopatogenia<br><br>Máximo diámetro de aorta                  |                                                                                                     |
| Rotura Traumática de aorta torácica (RTAT)                             | Grado de rotura                                                                       |                                                                                                     |
| Otros: Hematoma intramural (HIM), ulcera penetrante de aorta (UPA),... |                                                                                       |                                                                                                     |
| Variables intraoperatorias                                             |                                                                                       |                                                                                                     |
| Zona de Anclaje proximal                                               | Figura 1                                                                              |                                                                                                     |
| Zona de Anclaje distal                                                 | Figura 2                                                                              |                                                                                                     |
| Número de endoprótesis implantadas                                     |                                                                                       |                                                                                                     |
| Tipo de endoprótesis                                                   |                                                                                       |                                                                                                     |
| Ramas de Cayado de aorta cubiertas                                     | Carótidas, subclavia izquierda, tronco celiaco, arteria mesentérica superior, renales |                                                                                                     |

|                                               |                                                                                       |
|-----------------------------------------------|---------------------------------------------------------------------------------------|
| Ramas de Cayado de aorta revascularizadas     | Carótidas, subclavia izquierda, tronco celiaco, arteria mesentérica superior, renales |
| Volumen de pérdida de sangre                  |                                                                                       |
| <b>Variables postoperatorias</b>              |                                                                                       |
| Hemorragia que requiera reintervención        |                                                                                       |
| Infección                                     | Respiratoria, protésica, de tejidos, otras.                                           |
| Isquemia cerebral en los 30 primeros días     | incapacitante, no incapacitante.                                                      |
| Paraplejia                                    |                                                                                       |
| Eventos coronarios agudos                     |                                                                                       |
| Terapia renal sustitutiva                     |                                                                                       |
| Isquemia mesentérica                          |                                                                                       |
| Fallo respiratorio agudo                      |                                                                                       |
| <b>Mortalidad a los 30 días</b>               |                                                                                       |
| <b>Supervivencia tras la operación</b>        |                                                                                       |
| <b>Reintervención en los 30 primeros días</b> |                                                                                       |
